# Supplementary material for: Antibiotics with Interleukin-15 Inhibition Reduce Joint Inflammation and Bone Erosions but Not Cartilage Destruction in Staphylococcus aureus-Induced Arthritis
Source: PubMed Central journal article supplement (PMC5913847; doi:10.1128/iai.00960-17), 2018-04-23

# Supplemental Figure 1

▲ Isotype + PBS      ▲ aL-15ab + PBS  
 ○ Antibiotics + Isotype      ● aL-15ab + antibiotics

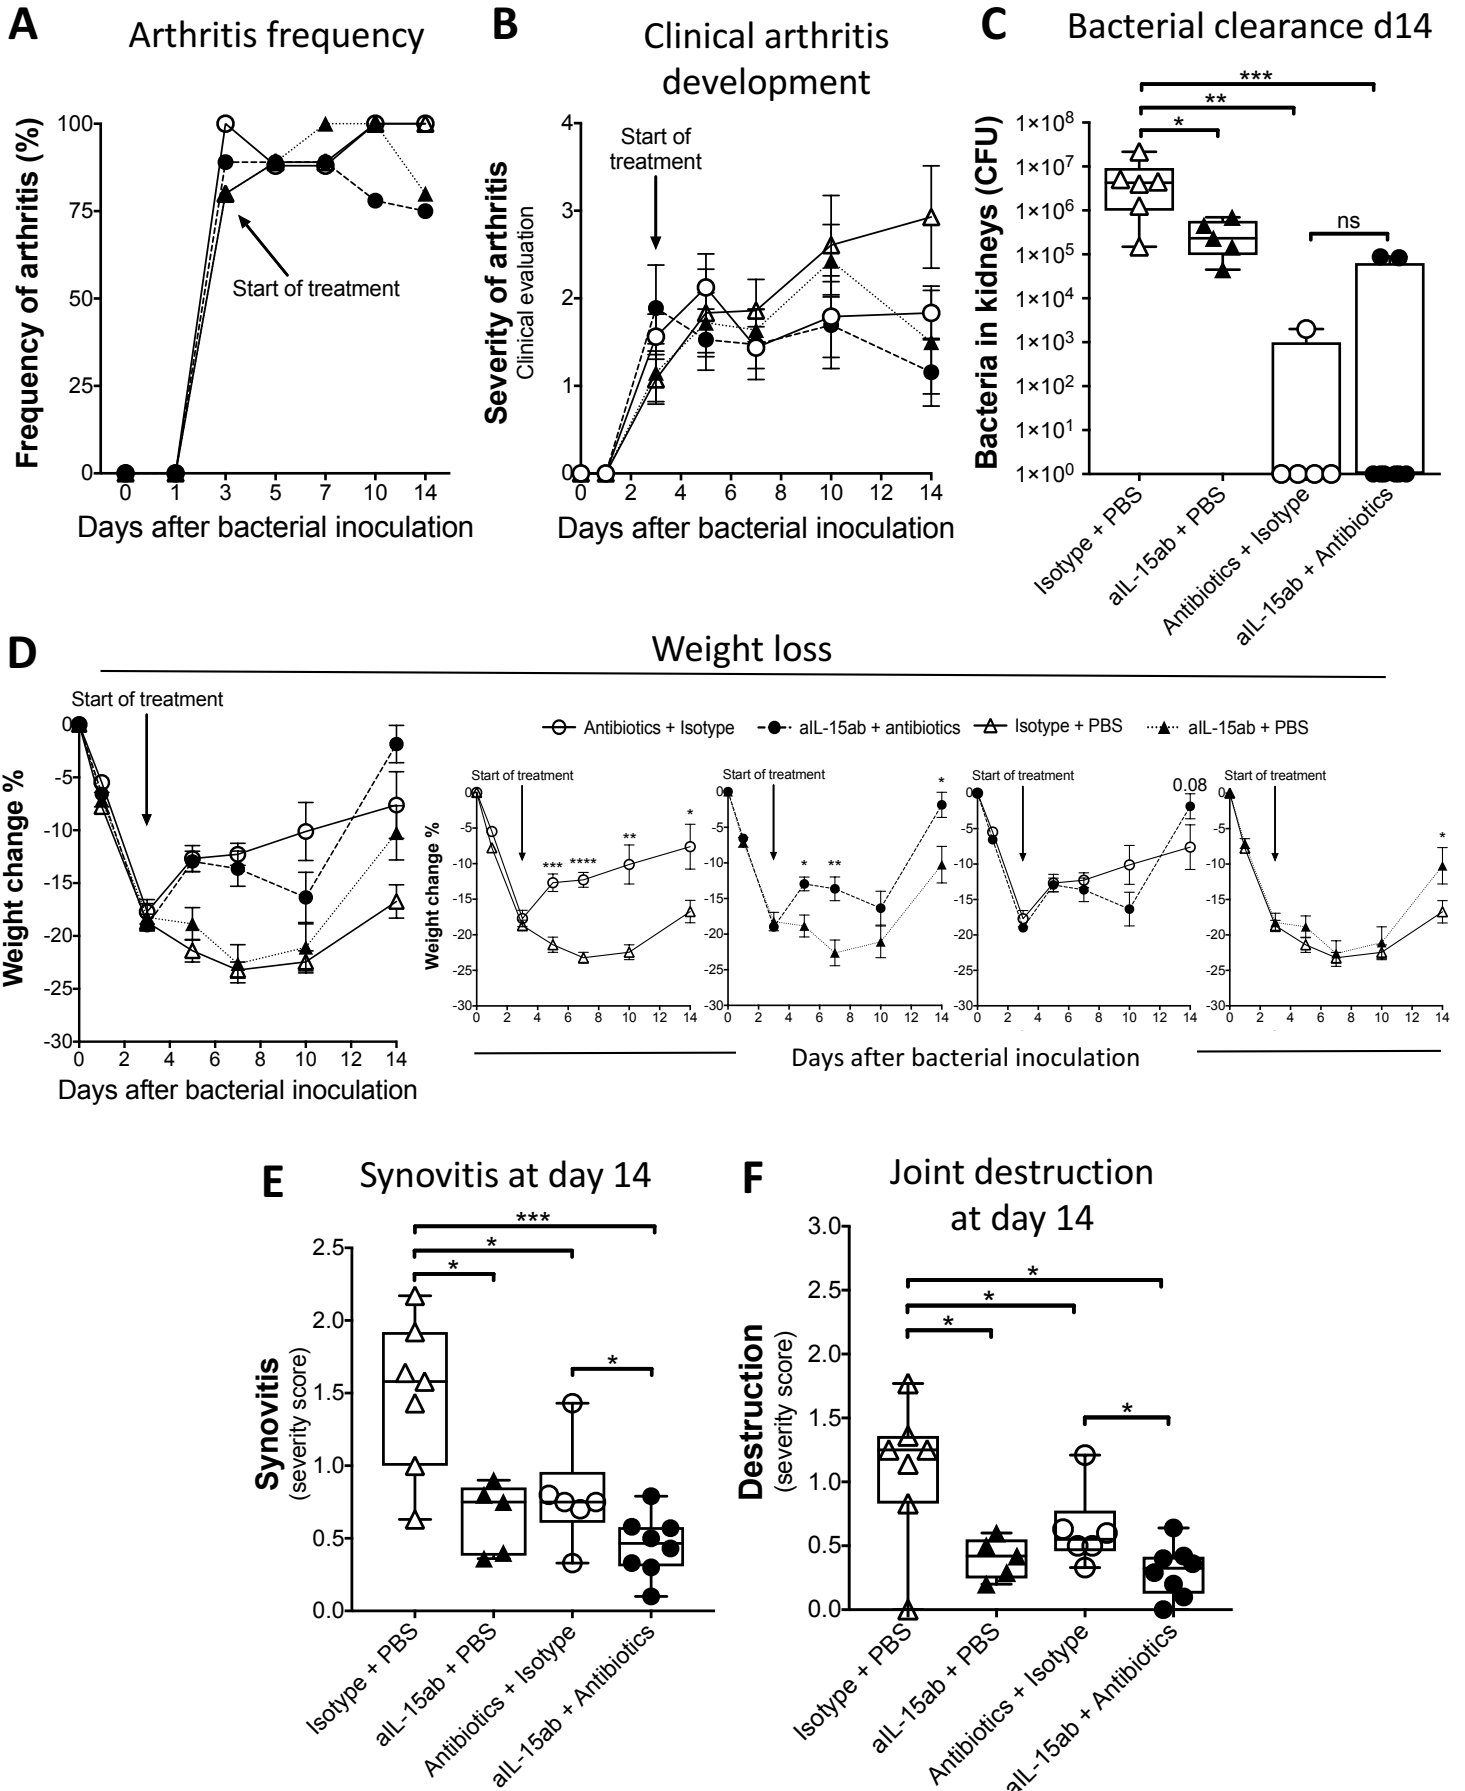

Supplement: IAI.00960-17_zii999092382s1.pdf [file IAI.00960-17_zii999092382s1.pdf]
