# Supplementary material for: Antibiotics with Interleukin-15 Inhibition Reduce Joint Inflammation and Bone Erosions but Not Cartilage Destruction in Staphylococcus aureus-Induced Arthritis
Source: PubMed Central journal article supplement (PMC5913847; doi:10.1128/iai.00960-17), 2018-04-23

# Supplemental Figure 3

Synovial membrane

○ A+Ctrl ab

● A+allL-15ab

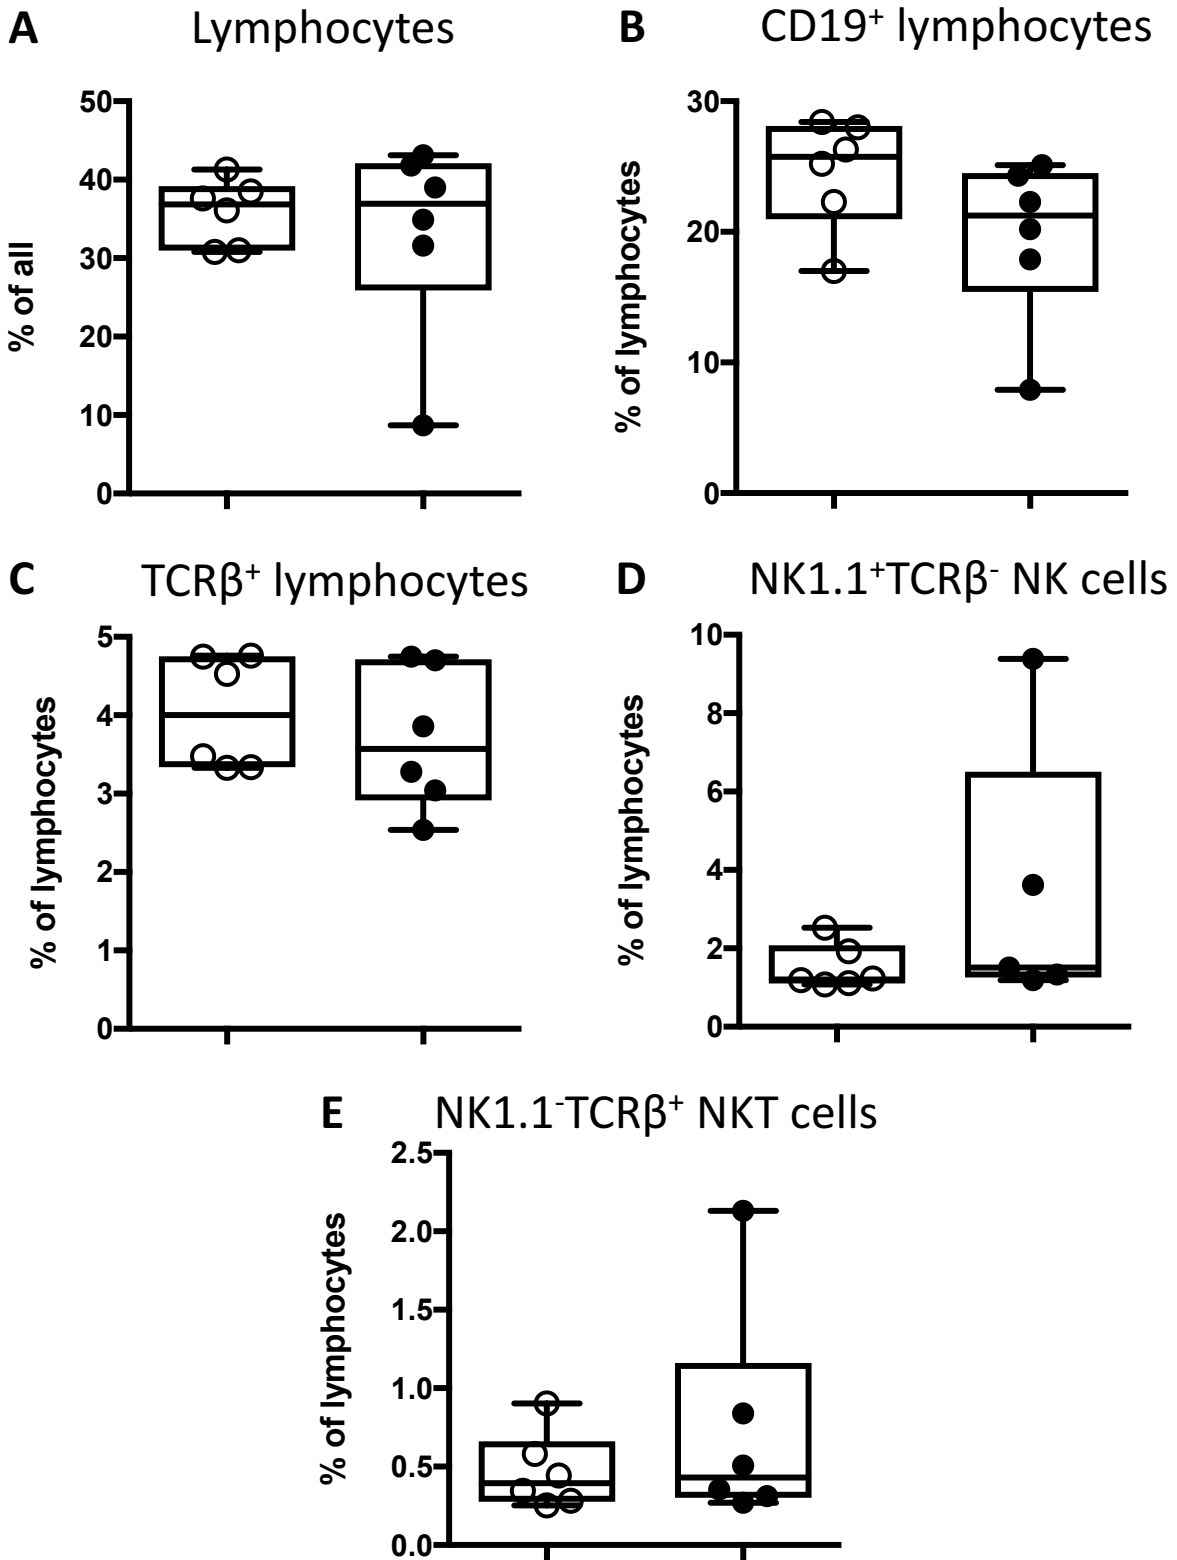

Supplement: IAI.00960-17_zii999092382s3.pdf [file IAI.00960-17_zii999092382s3.pdf]
