# Supplementary material for: Antibiotics with Interleukin-15 Inhibition Reduce Joint Inflammation and Bone Erosions but Not Cartilage Destruction in Staphylococcus aureus-Induced Arthritis
Source: PubMed Central journal article supplement (PMC5913847; doi:10.1128/iai.00960-17), 2018-04-23

# Supplemental Figure 4

## Draining lymph nodes

○ A+Ctrl ab

● A+aIL-15ab

### A Neutrophils

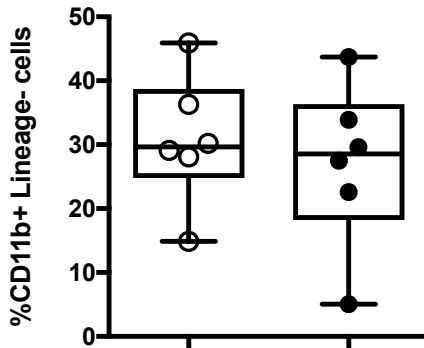

### B Lymphocytes

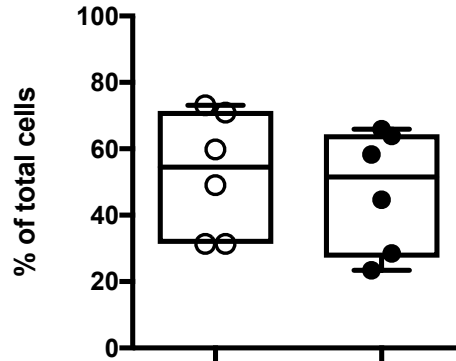

### C CD19+ lymphocytes

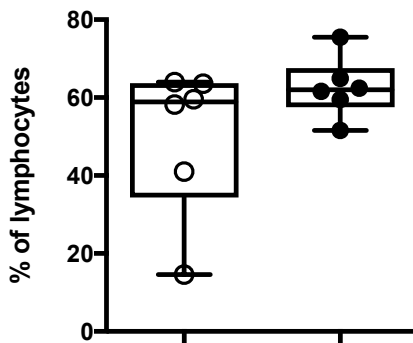

### D NK1.1+TCRβ- NK cells

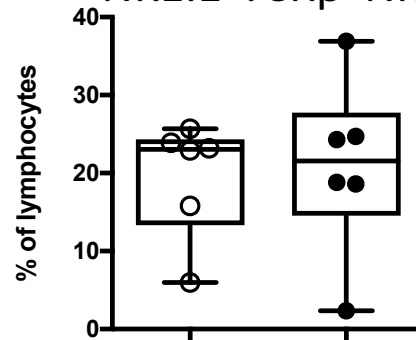

### E NK1.1-TCRβ+ NKT cells

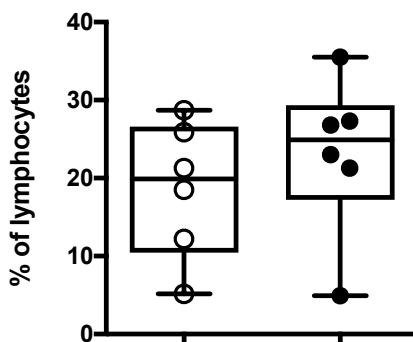

### F CD4+ lymphocytes

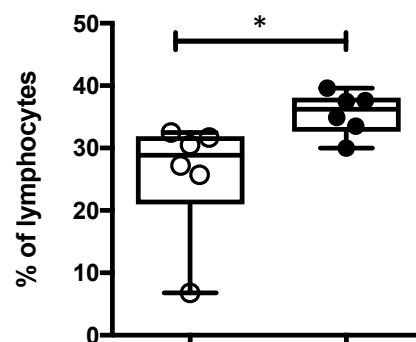

### G CD8+ lymphocytes

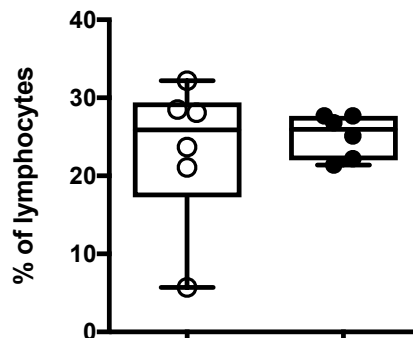

Supplement: IAI.00960-17_zii999092382s4.pdf [file IAI.00960-17_zii999092382s4.pdf]
