# Supplementary material for: Antibiotics with Interleukin-15 Inhibition Reduce Joint Inflammation and Bone Erosions but Not Cartilage Destruction in Staphylococcus aureus-Induced Arthritis
Source: PubMed Central journal article supplement (PMC5913847; doi:10.1128/iai.00960-17), 2018-04-23

# Supplemental Figure 5

## Bone marrow

○ A+Ctrl ab

● A+aIL-15ab

**A** CD11b<sup>+</sup> cells

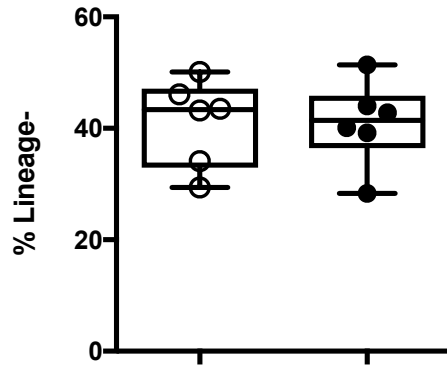

**B** Neutrophils

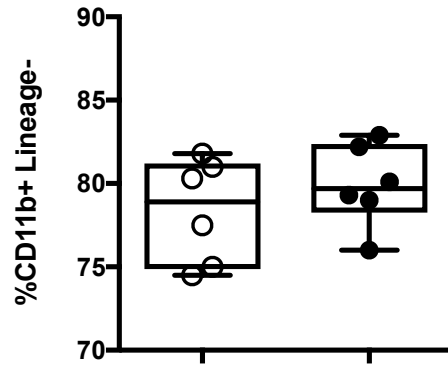

**C** Ly6C<sup>high</sup> inflammatory monocytes

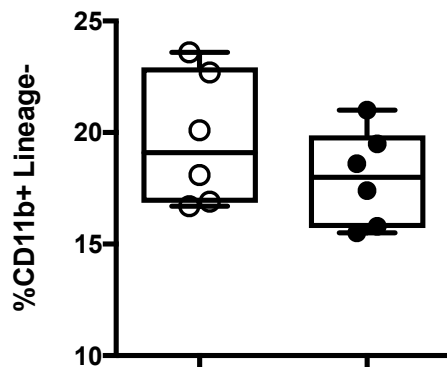

**D** Number of cells in the bone marrow

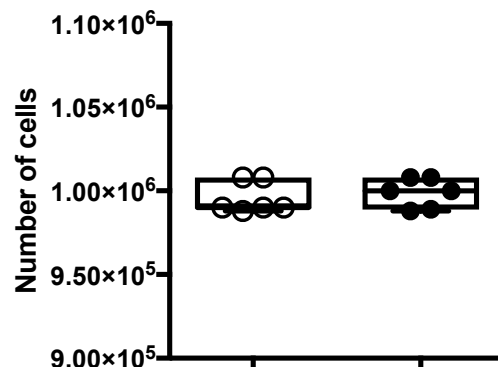

Supplement: IAI.00960-17_zii999092382s5.pdf [file IAI.00960-17_zii999092382s5.pdf]
