# Supplementary material for: Antibiotics with Interleukin-15 Inhibition Reduce Joint Inflammation and Bone Erosions but Not Cartilage Destruction in Staphylococcus aureus-Induced Arthritis
Source: PubMed Central journal article supplement (PMC5913847; doi:10.1128/iai.00960-17), 2018-04-23
Supplement: IAI.00960-17_zii999092382s6.pdf [file IAI.00960-17_zii999092382s6.pdf]

## Supplemental Table 1.

### Antibodies used for flow cytometry

| Mouse Antigen | Conjugate | Clone   | Source         |
|---------------|-----------|---------|----------------|
| TCRb          | APC       | H57-597 | eBioscience    |
| TCRb          | PE        | H57-597 | eBioscience    |
| Streptavidin  | FITC      |         | eBioscience    |
| CD8a          | PE        | 53-6.7  | eBioscience    |
| CD115         | APC       | AFS98   | eBioscience    |
| CD11c         | APC       | N418    | eBioscience    |
| CD19          | PE-Cy7    | 1D3     | eBioscience    |
| Ly6C          | APC-Cy7   | AL-21   | BD Biosciences |
| CD11b         | v450      | M1/70   | BD Biosciences |
| NK1.1         | biotin    | PK136   | BD Biosciences |
| CD4           | v450      | RM4-5   | BD Biosciences |
| CD11c         | PECy7     | HL3     | BD Biosciences |
| Ly6G          | PE        | IA8     | BD Biosciences |
| B220          | FITC      | RA3-6B2 | BD Pharmingen  |
| CD8a          | FITC      | 53-6.7  | BD Pharmingen  |
| CD4           | FITC      | H129.19 | BD Pharmingen  |
